# Supplementary material for: Ibrutinib targets mutant-EGFR kinase with a distinct binding conformation
Source: PubMed Central journal article supplement (PMC5342513; doi:10.18632/oncotarget.11951), 2016-09-10
Supplement: oncotarget-07-69760-s001.pdf [file oncotarget-07-69760-s001.pdf]

## Ibrutinib targets mutant-EGFR kinase with a distinct binding conformation

### Supplementary Materials

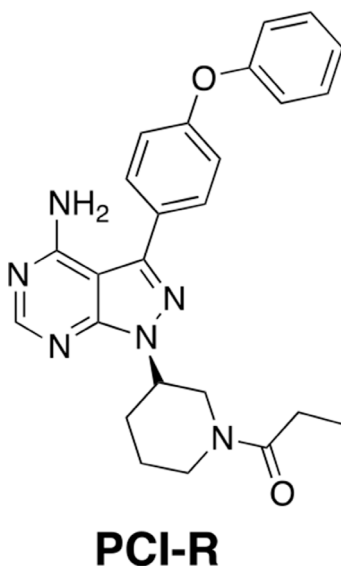

Supplementary Figure S1: Chemical Structure of PCI-R

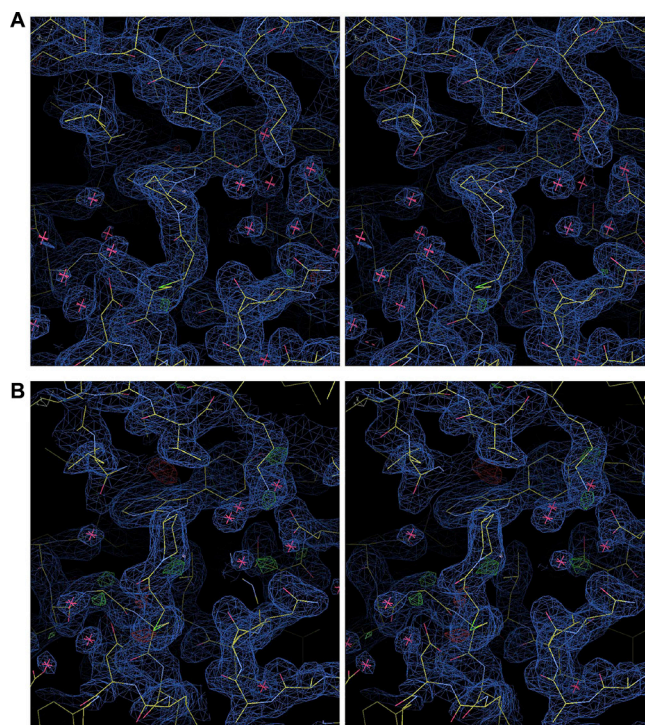

**Supplementary Figure S2: Electron density maps of the EGFR 696–1022 T790M+Ibrutinib complex crystal structure.** Stereo-view of the electron density (ED) maps are shown. The 2Fo-Fc map (blue) is contoured at 1.2σ, and the Fo-Fc maps are contoured at +3.0σ (green) and -3.0σ (red). (A) ED maps around Ibrutinib in Molecule 1 in the asymmetric unit representing the first binding mode of this compound to EGFR. (B) ED maps around Ibrutinib in Molecule 3 in the asymmetric unit representing the second binding mode of this compound to EGFR.
